# Supplementary material for: Aberrant APOBEC3B Expression in Breast Cancer Is Linked to Proliferation and Cell Cycle Phase
Source: MDPI journal article supplement (doi:10.3390/cells12081185), 2023-04-18
Supplement: s1 [file s1]

**Supplementary Table S1:** Relevant characteristics of the main cell lines used in this study.

| <b>Cell Line</b> | <b>Type</b>                | <b>A3B level</b> | <b>Synchronizable by double thymidine block?</b> | <b>Alternative synchronization option</b>          | <b>A3B inducibility by PMA</b> |
|------------------|----------------------------|------------------|--------------------------------------------------|----------------------------------------------------|--------------------------------|
| <b>MCF10A</b>    | Immortalized (normal-like) | Very low         | No (results in cell death)                       | Contact inhibition followed by mitogen deprivation | High during proliferation      |
| <b>MCF7</b>      | Breast cancer              | Low              | Yes                                              | Not tested                                         | Limited, during proliferation  |
| <b>HCC1954</b>   | Breast cancer              | Low/intermediate | Yes                                              | Not tested                                         | Not tested                     |
| <b>BT474</b>     | Breast cancer              | Intermediate     | No (proliferation rate too low)                  | Palbociclib                                        | Not tested                     |
| <b>HCC1143</b>   | Breast cancer              | High             | Yes                                              | Not tested                                         | Limited, during proliferation  |
